# Supplementary material
Source: publisher figshare collection journal article supplement (https://frontiersin.figshare.com/ndownloader/files/34858179)

Rarefaction curves

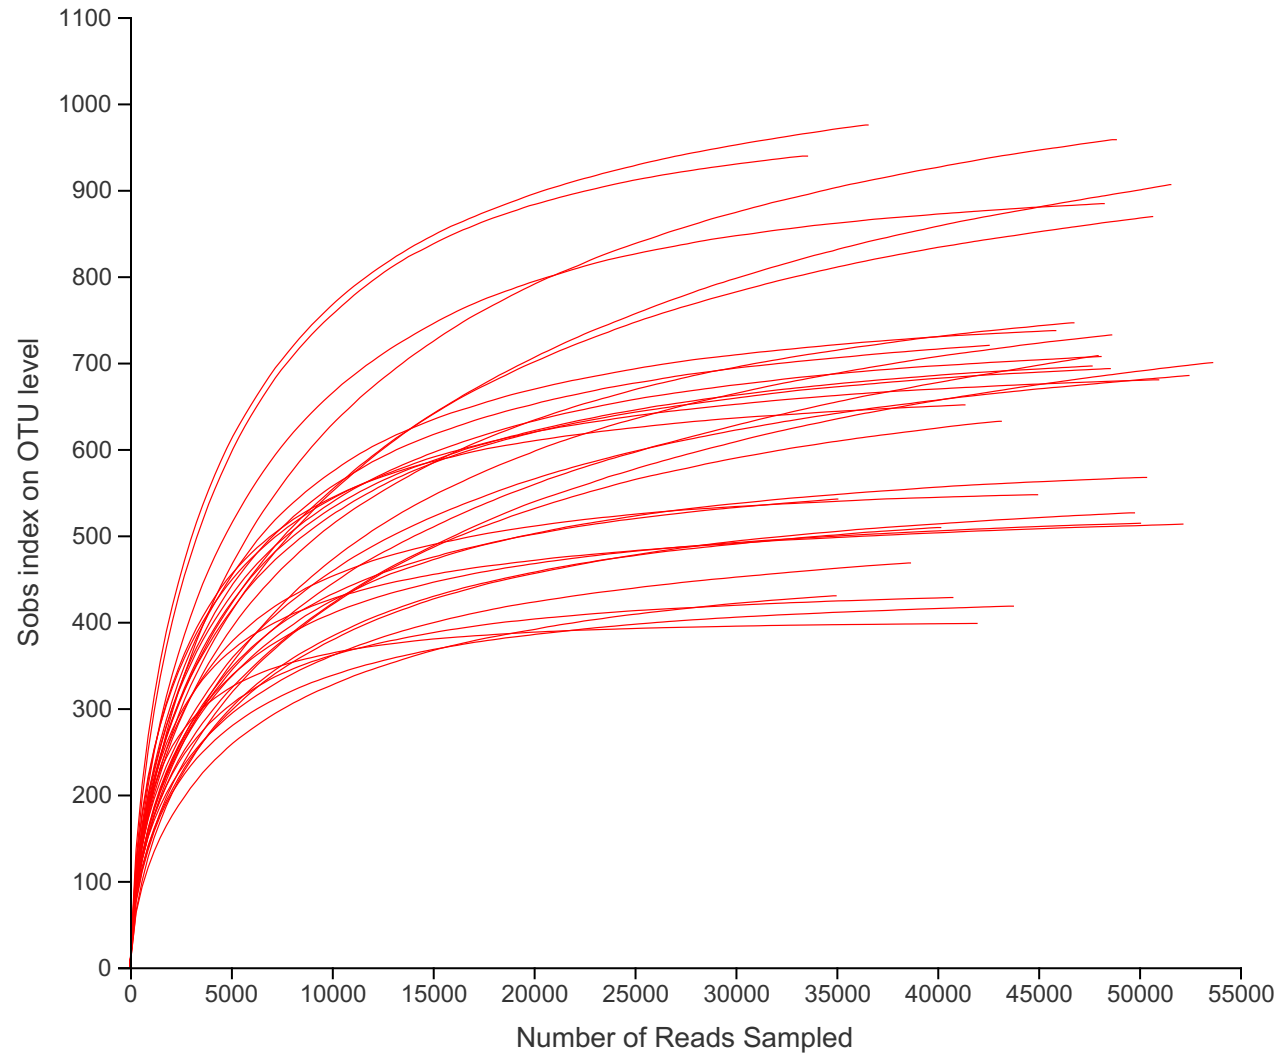

Supplement: Supplementary file [file 34858179]
